# Supplementary material for: A first-in-human Phase I trial of the oral p-STAT3 inhibitor WP1066 in patients with recurrent malignant glioma
Source: PubMed Central journal article supplement — CNS Oncol. 2022 May 16;11(2):CNS87. doi: 10.2217/cns-2022-0005 (PMC9134932; doi:10.2217/cns-2022-0005), 2022-05-16
Supplement: cns-11-87-s1.pdf [file cns-11-87-s1.pdf]

**Supplementary Table 1**

| <b>Antibodies used for the immune monitoring</b> |                |              |                          |                  |
|--------------------------------------------------|----------------|--------------|--------------------------|------------------|
| <b>Target</b>                                    | <b>Color</b>   | <b>Clone</b> | <b>Company</b>           | <b>Order No.</b> |
| CD3                                              | BV510          | OKT3         | Biologend                | # 317332         |
| CD4                                              | Pacific Blue   | OKT4         | Biologend                | # 317429         |
| IFN $\gamma$                                     | PE/Cy7         | B27          | Biologend                | # 506518         |
| TNF $\alpha$                                     | PE             | MAb11        | Biologend                | # 502909         |
| IL-2                                             | APC            | MQ1-17H12    | Biologend                | # 500310         |
| IL-13                                            | APC            | JES10-5A2    | Biologend                | # 501907         |
| IL-4                                             | PE/Cy7         | MP4 -25D2    | Biologend                | # 500824         |
| IL-5                                             | PE             | JES1-39D10   | Biologend                | # 500904         |
| CD3                                              | PerCP/Cy5.5    | OKT3         | Biologend                | # 317336         |
| CD4                                              | FITC           | SK3          | Biologend                | # 344604         |
| CD8                                              | Pacific Orange | 3B5          | Thermo Fisher Scientific | # MHCD0830       |
| CD25                                             | BV421          | M-A251       | Biologend                | # 356114         |
| FoxP3                                            | APC            | 236A/E7      | Thermo Fisher Scientific | # 17-4777-42     |
| IFN $\gamma$                                     | PE/Cy7         | B27          | Biologend                | # 506518         |
| TNF $\alpha$                                     | APC            | MAb11        | Biologend                | # 502912         |
| pSTAT3                                           | PE             |              | BD                       | # 612569         |
| Fixable Viability Dye                            | eFluor 780     |              | Thermo Fisher Scientific | # 65-0865-18     |
| <b>Isotype control antibodies</b>                |                |              |                          |                  |
| <b>Isotype</b>                                   | <b>Color</b>   | <b>Clone</b> | <b>Company</b>           | <b>Order No.</b> |
| Mouse IgG2, kappa                                | BV510          | MOPC-173     | Biologend                | # 400268         |
| Mouse IgG2b, kappa                               | Pacific Blue   | MPC-11       | Biologend                | # 400331         |
| Mouse IgG1, kappa                                | PE/Cy7         | MOPC-21      | Biologend                | # 400126         |
| Mouse IgG, kappa                                 | PE             | MOPC-21      | Biologend                | # 400140         |
| Rat IgG2a, kappa                                 | APC            | RTK2758      | Biologend                | # 400512         |
| Rat IgG1, kappa                                  | APC            | RTK2071      | Biologend                | # 400412         |
| Rat IgG1, kappa                                  | PE/Cy7         | RTK2071      | Biologend                | # 400416         |
| Rat IgG2a, kappa                                 | PE             | RTK2758      | Biologend                | # 400508         |
| Mouse IgG2a, kappa                               | PerCP/Cy5.5    | MOPC - 173   | Biologend                | # 400252         |
| Mouse IgG1, kappa                                | FITC           | MOPC-21      | Biologend                | # 400108         |
| Mouse IgG2a                                      | Pacific Orange |              | Thermo Fisher Scientific | # MG2A30         |
| Mouse IgG1, kappa                                | BV421          | MOPC-21      | Biologend                | # 400158         |
| Mouse IgG1, kappa                                | APC            | P3.6.2.8.1   | Thermo Fisher Scientific | # 17-4714-82     |
| Mouse IgG1, kappa                                | PE/Cy7         | MOPC-21      | Biologend                | # 400126         |
| Mouse IgG1, kappa                                | PE             | MOPC-21      | Biologend                | # 400140         |
| Mouse IgG1, kappa                                | APC            | MOPC-21      | Biologend                | # 400142         |
| Mouse IgG2a, $\kappa$                            | PE             | MOPC-173     | BD                       | # 550071         |

**Supplementary Table 2: PK Modeling Summary of WP1066 in Human Plasma**

| Enrollment number | Dose of WP1066 mg/kg | T <sub>1/2</sub> hr |      | Tmax hr |      | Cmax ng/mL |       | AUCall hr*ng/mL |       |
|-------------------|----------------------|---------------------|------|---------|------|------------|-------|-----------------|-------|
|                   |                      | C1D1                | C1D8 | C1D1    | C1D8 | C1D1       | C1D8  | C1D1            | C1D8  |
| 1                 | 1                    | 1.3                 | 1.2  | 0.5     | 2.0  | 32.6       | 11.7  | 53.0            | 40.0  |
| 2                 | 2                    | 2.8                 | 1.1  | 0.5     | 2.0  | 31.0       | 31.8  | 80.0            | 64.0  |
| 3                 | 4                    | 23.0                | 6.2  | 8.0     | 0.5  | 45.5       | 116.0 | 324.0           | 294.0 |
| 4                 | 4                    | 7.1                 | 5.0  | 0.5     | 0.5  | 23.3       | 23.6  | 93.5            | 64.2  |
| 5                 | 4                    | NA                  | NA   | 0.5     | 2.0  | 60.1       | 60.1  | 188.0           | 156.0 |
| 6                 | 8                    | 2.3                 | 2.4  | 24      | 24   | 64.7       | 39.9  | 1011.0          | 849.0 |
| 7                 | 8                    | 3.7                 | 1.5  | 1.0     | 8.0  | 43.3       | 117.0 | 529.0           | 914.0 |
